# Supplementary material for: Discovery of an essential nucleotidylating activity associated with a newly delineated conserved domain in the RNA polymerase-containing protein of all nidoviruses
Source: PubMed Central journal article supplement — Nucleic Acids Res. 2015 Aug 24;43(17):8416–34. doi: 10.1093/nar/gkv838 (PMC4787807; doi:10.1093/nar/gkv838), 2015-08-24
Supplement: supp_gkv838_nar-01179-z-2015-File012.pdf [file supp_gkv838_nar-01179-z-2015-File012.pdf]

## Supplementary Files

### Supplementary Material and Methods

#### Synthesis of 5'-(4-fluorosulfonylbenzoyl)guanosine (FSBG)

Guanosine monohydrate (875 mg, 2.90 mmol) was co-evaporated twice with anhydrous DMF and subsequently dissolved in DMPU with gentle warming. The clear solution was cooled in an ice bath, and 4-(fluorosulfonyl)benzoyl chloride (812 mg, 3.65 mmol) was added. After 15 minutes the mixture was warmed to room temperature and stirred for another 4 hours. Petroleum ether 40/60 (50 mL) was added and a white precipitate formed. The organic layer was decanted and the residue triturated twice with a 1/1 mixture of ethyl acetate/diethyl ether (2 x 50 mL). The residue was re-crystallized from MeOH/water and further purified by C18-RP-HPLC (Phenomenex Gemini C18, pore size 110Å, particle size 5 µm, 150 x 21.2 mm, gradient 20 – 50% Acetonitrile in 0.1 % aqueous TFA, 20 mL/min) to yield the title compound as a white solid (232 mg, yield 17%) (Supplementary Figure 5).

#### Supplementary tables

**Table S1:** Virus genome used for the bioinformatics analyses.

| Virus name                             | Species                                                      | (Sub)family          | Acronym     | Accession number |
|----------------------------------------|--------------------------------------------------------------|----------------------|-------------|------------------|
| Gill-associated virus                  | <i>Gill-associated virus</i>                                 | <i>Roniviridae</i>   | GAV         | AF227196         |
| Yellow head virus                      | to be established                                            | <i>Roniviridae</i>   | YHV         | EU487200         |
| Cavally virus                          | <i>Alphamesonivirus 1</i>                                    | <i>Mesoniviridae</i> | CAVV        | HM746600         |
| Casuarina virus                        | to be established                                            | <i>Mesoniviridae</i> | CASV        | NC_023986        |
| Dak Nong virus                         | to be established                                            | <i>Mesoniviridae</i> | DKNV        | AB753015.2       |
| Hana virus                             | to be established                                            | <i>Mesoniviridae</i> | HanaV       | JQ957872         |
| Nse virus                              | to be established                                            | <i>Mesoniviridae</i> | NseV        | JQ957874         |
| Meno virus                             | to be established                                            | <i>Mesoniviridae</i> | MenoV       | JQ957873         |
| SARS coronavirus Frankfurt 1           | <i>Severe acute respiratory syndrome-related coronavirus</i> | <i>Coronavirinae</i> | SARS-CoV    | AY291315         |
| Rabbit coronavirus HKU14               | <i>Betacoronavirus 1</i>                                     | <i>Coronavirinae</i> | RbCoV_HKU14 | JN874560         |
| Murine hepatitis virus strain 2        | <i>Murine coronavirus</i>                                    | <i>Coronavirinae</i> | MHV-2       | AF201929         |
| Human coronavirus HKU1                 | <i>Human coronavirus HKU1</i>                                | <i>Coronavirinae</i> | HCoV_HKU1   | AY884001         |
| Betacoronavirus Erinaceus/VMC/DEU/2012 | to be established                                            | <i>Coronavirinae</i> | EriCoV      | KC545383         |

| <b>Virus name</b>                    | <b>Species</b>                           | <b>(Sub)family</b>   | <b>Acronym</b> | <b>Accession number</b> |
|--------------------------------------|------------------------------------------|----------------------|----------------|-------------------------|
| Bat coronavirus (BtCoV/133/2005)     | <i>Tylonycteris bat coronavirus HKU4</i> | <i>Coronavirinae</i> | BtCoV/133/2005 | DQ648794                |
| Bat coronavirus HKU5-1               | <i>Pipistrellus bat coronavirus HKU5</i> | <i>Coronavirinae</i> | BtCoV_HKU5     | EF065509                |
| MERS coronavirus EMC/2012            | to be established                        | <i>Coronavirinae</i> | MERS-CoV       | JX869059.2              |
| Bat coronavirus HKU9-10-2            | <i>Rousettus bat coronavirus HKU9</i>    | <i>Coronavirinae</i> | BtCoV_HKU9     | HM211101                |
| Bat coronavirus CDPHE15/USA/2006     | to be established                        | <i>Coronavirinae</i> | BtCoV_CDPHE15  | KF430219                |
| Human coronavirus NL63               | <i>Human coronavirus NL63</i>            | <i>Coronavirinae</i> | HCoV-NL63      | AY567487                |
| Miniopterus bat coronavirus HKU8     | <i>Miniopterus bat coronavirus HKU8</i>  | <i>Coronavirinae</i> | BtCoV_HKU8     | EU420139                |
| Rhinolophus bat coronavirus HKU2     | <i>Rhinolophus bat coronavirus HKU2</i>  | <i>Coronavirinae</i> | BtCoV_HKU2     | EF203064                |
| Bat coronavirus 1A                   | <i>Miniopterus bat coronavirus 1</i>     | <i>Coronavirinae</i> | BtCoV_1A       | EU420138                |
| Alpaca respiratory coronavirus       | <i>Human coronavirus 229E</i>            | <i>Coronavirinae</i> | ACoV           | JQ410000                |
| Bat coronavirus (BtCoV/512/2005)     | <i>Scotophilus bat coronavirus 512</i>   | <i>Coronavirinae</i> | BtCoV/512/2005 | DQ648858                |
| Porcine epidemic diarrhea virus      | <i>Porcine epidemic diarrhea virus</i>   | <i>Coronavirinae</i> | PEDV           | KC140102                |
| Rousettus bat coronavirus HKU10      | to be established                        | <i>Coronavirinae</i> | BtCoV_HKU10    | JQ989271                |
| Mink coronavirus strain WD1127       | to be established                        | <i>Coronavirinae</i> | MCoV           | HM245925                |
| Feline coronavirus UU2               | <i>Alphacoronavirus 1</i>                | <i>Coronavirinae</i> | FCoV_UU2       | FJ938060                |
| Infectious bronchitis virus          | <i>Avian coronavirus</i>                 | <i>Coronavirinae</i> | IBV            | KC008600                |
| Bottlenose dolphin coronavirus HKU22 | <i>Beluga whale coronavirus SW1</i>      | <i>Coronavirinae</i> | BdCoV_HKU22    | KF793824                |
| Sparrow coronavirus HKU17            | to be established                        | <i>Coronavirinae</i> | SpCoV_HKU17    | JQ065045                |
| Munia coronavirus HKU13-3514         | <i>Munia coronavirus HKU13</i>           | <i>Coronavirinae</i> | MuCoV_HKU13    | FJ376622                |
| Common-moorhen coronavirus HKU21     | to be established                        | <i>Coronavirinae</i> | CMCoV_HKU21    | JQ065049                |
| Bulbul coronavirus HKU11-934         | <i>Bulbul coronavirus HKU11</i>          | <i>Coronavirinae</i> | BuCoV_HKU11    | FJ376619.2              |

| <b>Virus name</b>                                   | <b>Species</b>                                             | <b>(Sub)family</b>   | <b>Acronym</b> | <b>Accession number</b> |
|-----------------------------------------------------|------------------------------------------------------------|----------------------|----------------|-------------------------|
| Thrush coronavirus HKU12-600                        | <i>Thrush coronavirus HKU12</i>                            | <i>Coronavirinae</i> | ThCoV_HKU12    | FJ376621                |
| White-eye coronavirus HKU16                         | to be established                                          | <i>Coronavirinae</i> | WECoV_HKU16    | JQ065044                |
| Night-heron coronavirus HKU19                       | to be established                                          | <i>Coronavirinae</i> | NHCoV_HKU19    | JQ065047                |
| Wigeon coronavirus HKU20                            | to be established                                          | <i>Coronavirinae</i> | WiCoV_HKU20    | JQ065048                |
| Porcine torovirus                                   | <i>Porcine torovirus</i>                                   | <i>Torovirinae</i>   | PToV_SH1       | NC_022787               |
| Breda virus                                         | <i>Bovine torovirus</i>                                    | <i>Torovirinae</i>   | BRV-1          | AY427798                |
| White bream virus                                   | <i>White bream virus</i>                                   | <i>Torovirinae</i>   | WBV            | DQ898157                |
| Fathead minnow nidovirus                            | to be established                                          | <i>Torovirinae</i>   | FHMNV          | GU002364.2              |
| Ball python nidovirus                               | to be established                                          | <i>Torovirinae</i>   | BPNV           | NC_024709               |
| Possum nidovirus                                    | to be established                                          | <i>Arteriviridae</i> | WPDV           | JN116253                |
| Simian hemorrhagic fever virus                      | <i>Simian hemorrhagic fever virus</i>                      | <i>Arteriviridae</i> | SHFV-LVR       | AF180391                |
| Simian hemorrhagic fever virus                      | to be established                                          | <i>Arteriviridae</i> | SHFV-krtg2     | JX473847                |
| Simian hemorrhagic fever virus                      | to be established                                          | <i>Arteriviridae</i> | SHFV-krtg1     | JX473848                |
| Simian hemorrhagic fever virus                      | to be established                                          | <i>Arteriviridae</i> | SHFV-krc1      | HQ845737                |
| Porcine reproductive and respiratory syndrome virus | <i>Porcine reproductive and respiratory syndrome virus</i> | <i>Arteriviridae</i> | PRRSV-2        | JX138233                |
| Porcine reproductive and respiratory syndrome virus | <i>Porcine reproductive and respiratory syndrome virus</i> | <i>Arteriviridae</i> | PRRSV-1        | GU737264.2              |
| Lactate dehydrogenase-elevating virus               | <i>Lactate dehydrogenase-elevating virus</i>               | <i>Arteriviridae</i> | LDV-C          | L13298                  |
| Lactate dehydrogenase-elevating virus               | <i>Lactate dehydrogenase-elevating virus</i>               | <i>Arteriviridae</i> | LDV-P          | U15146                  |
| Equine arteritis virus                              | <i>Equine arteritis virus</i>                              | <i>Arteriviridae</i> | EAV            | DQ846750                |

**Table S2. Multiple sequence alignment of NiRAN of nidoviruses** (see a separate file in fasta format).

## **Supplementary figures**

JPRED\_R  
 PSIPRED\_R  
 JPRED\_M  
 PSIPRED\_M  
 JPRED\_C  
 PSIPRED\_C  
 JPRED\_A  
 PSIPRED\_A

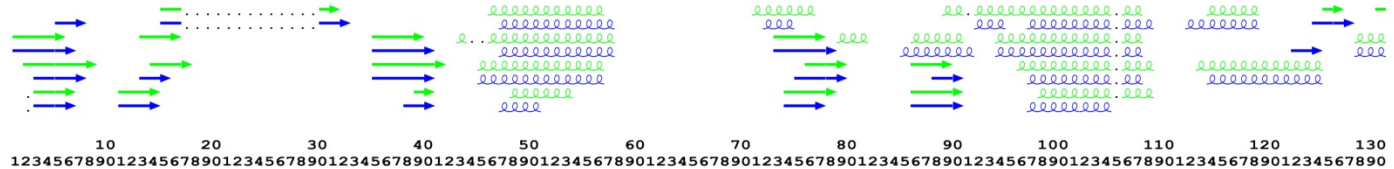

**Roniviridae**  
 GAV HTSGIFCKPRASSSTL.....IINGKNRHYTKHS..LTRIKIAQTLS.....HIPEAIQFKKD....SHGYR.EISQFSLADV LHG.FANQIEPDLFLAKYTNERNIKVSKTT  
 YHV HTSGIFCKPRASSSTL.....IINGKNRHYTKHS..LKRIRKTAQALS.....HEHYR.EISQFSLADV LHG.FANQIEPDLFLAKYTNERNIKVSNVT

**Mesoniviridae**  
 CASV HTIDISCN.KTSTSYI.....DEVNNVNVKIKQH..IVRDKYKIYEMLLN.....QYPNLFLEHKKLVNFTIPHLRYNMTALSFADLYGL.IKEENWHFIDYDTPQVTYHKINDDL  
 DKNV HTIDISCN.KTSTSYI.....DEYNQTVNVKKEH..IVREYIYETLLN.....QDSNLFLEHKKLVHATIPHLRYNMTALSFADLYGL.IKEENWHFIDYDTPQVTYHKINDDL  
 HanaV YTIDISCN.KTSTSYI.....DSKNNIVNVKIKNN..IVREYIYEMLLN.....QYSDLFLEHKKMVTSTIPHLRYNMTALSFADLYGL.IKDENWHFIDYDTPQVTYHNINDDL  
 NseV YTIDISCN.KTSTSYI.....NEQSQIVNVKPKAH..VKYQLVYDTLN.....QESDLFLEHQLETPIPYLRDLMTALSVADLYGV.IKDENWHFIDYDTPQVYHKLQDLD  
 MenoV YTLDISCN.KTSTSYI.....TFNSEIVNVKVPFN..IERDHTIYEMLTKT.....SKIDLFLIEHQTFRQSIYNLNRYNMTALSFADLYGV.IKSNWPKLYDTPQVYHKLQDLD

**Coronavirinae**  
 SARS-CoV VAGFAKFL.KVNCRRFQEK..DEEG...NLLDSYFVVRKHTMSNYOHEFTIYNLVKD.....CPAVAVHDFEFKFDVDCMVPVHISORLTRYTMADLVYA.LRHFDGNCDDTLKELILVTVYCCDDD  
 BtCoV\_HKU4 VAGIGLHL.KVNCRRFQRL..DESG...NKMDRFVVRKTDLVYVNRMECYERVKD.....CRVVAEHDFEFKFDVDCMVPVHISORLTRYTMADLVYA.LRHFDGNCDDTLKELILVTVYCCDDD  
 MHV-2 RAGIGLYY.KVNCRRFQRI..DEEG...NLLDKFVVRKTNLEVYVNRKCYELTRK.....CGVVAEHDFEFKFDVDCMVPVHISORLTRYTMADLVYA.LRHFDGNCDDTLKELILVTVYCCDDD  
 HCoV\_HKU1 VAGIGKHY.KTNTCRFVEL..DDQG...HKLDSYFVVRKHTMSNYEIRKCYDLDLKA.....CDVAAHDFEFKFDVDCMVPVHISORLTRYTMADLVYA.LRHFDGNCDDTLKELILVTVYCCDDD  
 EriCoV VAGIGKHY.KTNTCRFVEL..DDQG...HKLDSYFVVRKHTMSNYEIRKCYDLDLKA.....CDVAAHDFEFKFDVDCMVPVHISORLTRYTMADLVYA.LRHFDGNCDDTLKELILVTVYCCDDD  
 BtCoV/133/2005 VAGIGKHY.KTNTCRFVEL..DDQG...HKLDSYFVVRKHTMSNYEIRKCYDLDLKA.....CDVAAHDFEFKFDVDCMVPVHISORLTRYTMADLVYA.LRHFDGNCDDTLKELILVTVYCCDDD  
 BtCoV\_HKU5 VAGIGKHY.KTNTCRFVEL..DDQG...HKLDSYFVVRKHTMSNYEIRKCYDLDLKA.....CDVAAHDFEFKFDVDCMVPVHISORLTRYTMADLVYA.LRHFDGNCDDTLKELILVTVYCCDDD  
 MERS-CoV VAGIGKHY.KTNTCRFVEL..DDQG...HKLDSYFVVRKHTMSNYEIRKCYDLDLKA.....CDVAAHDFEFKFDVDCMVPVHISORLTRYTMADLVYA.LRHFDGNCDDTLKELILVTVYCCDDD  
 BtCoV\_HKU9 VAGIGKHY.KTNTCRFVEL..DDQG...HKLDSYFVVRKHTMSNYEIRKCYDLDLKA.....CDVAAHDFEFKFDVDCMVPVHISORLTRYTMADLVYA.LRHFDGNCDDTLKELILVTVYCCDDD  
 BtCoV\_CDPHE15 VAGIGKFL.KVNCVRFKNA.....DKHDAFVIVRCKTSVMEHQSIYDILK.....SGALAEHDFEFKFDVDCMVPVHISORLTRYTMADLVYA.LRHFDGNCDDTLKELILVTVYCCDDD  
 HCoV-NL63 VAGIGKFL.KVNCVRFKNA.....DKHDAFVIVRCKTSVMEHQSIYDILK.....SGALAEHDFEFKFDVDCMVPVHISORLTRYTMADLVYA.LRHFDGNCDDTLKELILVTVYCCDDD  
 BtCoV\_HKU8 VAGIGKFL.KVNCVRFKNA.....DKHDAFVIVRCKTSVMEHQSIYDILK.....SGALAEHDFEFKFDVDCMVPVHISORLTRYTMADLVYA.LRHFDGNCDDTLKELILVTVYCCDDD  
 BtCoV\_HKU2 VAGIGKFL.KVNCVRFKNA.....DKHDAFVIVRCKTSVMEHQSIYDILK.....SGALAEHDFEFKFDVDCMVPVHISORLTRYTMADLVYA.LRHFDGNCDDTLKELILVTVYCCDDD  
 BtCoV\_1A VAGIGKFL.KVNCVRFKNA.....DKHDAFVIVRCKTSVMEHQSIYDILK.....SGALAEHDFEFKFDVDCMVPVHISORLTRYTMADLVYA.LRHFDGNCDDTLKELILVTVYCCDDD  
 ACov VAGIGKFL.KVNCVRFKNA.....DKHDAFVIVRCKTSVMEHQSIYDILK.....SGALAEHDFEFKFDVDCMVPVHISORLTRYTMADLVYA.LRHFDGNCDDTLKELILVTVYCCDDD  
 BtCoV/512/2005 VAGIGKFL.KVNCVRFKNA.....DKHDAFVIVRCKTSVMEHQSIYDILK.....SGALAEHDFEFKFDVDCMVPVHISORLTRYTMADLVYA.LRHFDGNCDDTLKELILVTVYCCDDD  
 PEDV VAGIGKFL.KVNCVRFKNA.....DKHDAFVIVRCKTSVMEHQSIYDILK.....SGALAEHDFEFKFDVDCMVPVHISORLTRYTMADLVYA.LRHFDGNCDDTLKELILVTVYCCDDD  
 BtCoV\_HKU10 VAGIGKFL.KVNCVRFKNA.....DKHDAFVIVRCKTSVMEHQSIYDILK.....SGALAEHDFEFKFDVDCMVPVHISORLTRYTMADLVYA.LRHFDGNCDDTLKELILVTVYCCDDD  
 MCoV VAGIGKFL.KVNCVRFKNA.....DKHDAFVIVRCKTSVMEHQSIYDILK.....SGALAEHDFEFKFDVDCMVPVHISORLTRYTMADLVYA.LRHFDGNCDDTLKELILVTVYCCDDD  
 FCoV\_UU2 VAGIGKFL.KVNCVRFKNA.....DKHDAFVIVRCKTSVMEHQSIYDILK.....SGALAEHDFEFKFDVDCMVPVHISORLTRYTMADLVYA.LRHFDGNCDDTLKELILVTVYCCDDD  
 IBV TAGMYASL.KHNCARFQEL..DEND...DEIDSFFVVRKHTMSNYEIRKCYDLDLKA.....ADCVAVHDFEFKFDVDCMVPVHISORLTRYTMADLVYA.LRHFDGNCDDTLKELILVTVYCCDDD  
 BdCoV\_HKU22 TAGMYASL.KHNCARFQEL..DEND...DEIDSFFVVRKHTMSNYEIRKCYDLDLKA.....ADCVAVHDFEFKFDVDCMVPVHISORLTRYTMADLVYA.LRHFDGNCDDTLKELILVTVYCCDDD  
 SpCoV\_HKU17 TSGIFLST.KTNCARFKIVRSALPLPN.KGEVDLYFVTKOCQAQVFEIRKCYNLAELIYTTDETFVGLAKTEFFFKF.DK...IPNVNRQYLYTRYTLDDLVYA.LRHLSSTSK.DVIOEILITMCGTPEE  
 MuCoV\_HKU13 TSGIFLST.KTNCARFKIVRSALPLPN.KGEVDLYFVTKOCQAQVFEIRKCYNLAELIYTTDETFVGLAKTEFFFKF.DK...IPNVNRQYLYTRYTLDDLVYA.LRHLSSTSK.DVIOEILITMCGTPEE  
 CMCoV\_HKU21 TSGIFLST.KTNCARFKIVRSALPLPN.KGEVDLYFVTKOCQAQVFEIRKCYNLAELIYTTDETFVGLAKTEFFFKF.DK...IPNVNRQYLYTRYTLDDLVYA.LRHLSSTSK.DVIOEILITMCGTPEE  
 BuCoV\_HKU11 TSGIFLST.KTNCARFKIVRSALPLPN.KGEVDLYFVTKOCQAQVFEIRKCYNLAELIYTTDETFVGLAKTEFFFKF.DK...IPNVNRQYLYTRYTLDDLVYA.LRHLSSTSK.DVIOEILITMCGTPEE  
 ThCoV\_HKU12 TSGIFLST.KTNCARFKIVRSALPLPN.KGEVDLYFVTKOCQAQVFEIRKCYNLAELIYTTDETFVGLAKTEFFFKF.DK...IPNVNRQYLYTRYTLDDLVYA.LRHLSSTSK.DVIOEILITMCGTPEE  
 WCoV\_HKU16 TSGIFLST.KTNCARFKIVRSALPLPN.KGEVDLYFVTKOCQAQVFEIRKCYNLAELIYTTDETFVGLAKTEFFFKF.DK...IPNVNRQYLYTRYTLDDLVYA.LRHLSSTSK.DVIOEILITMCGTPEE  
 NHCov\_HKU19 TAGIFKST.KNNCARFKIVRSALPLPN.KGEVDLYFVTKOCQAQVFEIRKCYNLAELIYTTDETFVGLAKTEFFFKF.DK...IPNVNRQYLYTRYTLDDLVYA.LRHLSSTSK.DVIOEILITMCGTPEE  
 NiCoV\_HKU20 TAGIFKST.KNNCARFKIVRSALPLPN.KGEVDLYFVTKOCQAQVFEIRKCYNLAELIYTTDETFVGLAKTEFFFKF.DK...IPNVNRQYLYTRYTLDDLVYA.LRHLSSTSK.DVIOEILITMCGTPEE

**Torovirinae**  
 TCoV\_SH1 NAGIVKVN.KSNTHSVE.....FVGRKRYIKRVKD..QHEFALRSATSF.....LPSIIPHMMVSY.NN..EWFVLRGPTTQWSLGDLVYA.IWL..GDQYLABCCGFVFNPSRD.  
 BRV-1 NAGIVKVN.KSNTHSVE.....FVGRKRYIKRVKD..QHEFALRSATSF.....LPSIIPHMMVHO.NG..EWFVLRGPTTQWSLGDLVYA.IWL..GDQYLABCCGFVFNPSRD.  
 WBV VASLRKVF.KKNTASIP.....SENGTMLKDTGT..AHEIVVAQQLIAGK.....LP.VLQHARFNH.DG..TDYLYRYTTPYSLGDLVYA.YMV..GD..FKHMLLADLITDE.  
 FHMNV NMRIAKFP.KESTASIP.....TQGHNTMLKTKOT..AHELATATVLTQKQ.....LP.VLKHDRINY.NK..QDILVRYTTPYSLGDLVYA.YQL..GD..LQHMQLVLDLTDH.  
 BPNV DCGKRLN.KCRTTSIQ.....INNRNHLTKGTTEEDLRHEYNQYIALRDL.....IA.MPEHKLQLENG..SYLIRGPTVTEKSLGDLVYS.HLH.....NQTEDAVEIPDK.

**Arteriviridae**  
 WPDV I.TIVPRS.RTFIC.....GAFNIKVLPL...TRKREINN.....TPAGSYDLENG.....CMIRPHYP..SLIDKLLA.AIH.....  
 K.IITHA.RTRAF.....SSIDFKAAS...FALARTAF.....FLVLRHPP..SLIDVLIK.GLD.....  
 A.IVHHS.RTRAF.....NCGDLKAVS...FALARTAF.....FLVLRHPP..SLIDVLIK.GLD.....  
 A.IVDHHS.RTRAF.....NCGDLKAVS...PEANRTLR...SPTQPVVARLADG...YLIMRHPP..SLIDVLIK.GLD.....  
 K.IVDYHS.RTVAF.....ADDLKVIVD..ANELDRNRL.....SLEPOPVVATTDGK...FVIRKHPH..SLIDVLIK.GLD.....  
 K.IVKFHS.RTFIL.....GPNVLKVAS...EVELDRVAEH...NCPVAVRPVDDG...VVLIRSAVP..SLIDVLLIS.GAD.....  
 PRRSV-1 K.IIKYHS.RTFIL.....GPNVLKVAS...EVELDRVAEH...NCPVAVRPVDDG...VVLIRSAVP..SLIDVLLIS.GAD.....  
 PRRSV-2 K.IIKYHS.RTFIL.....GPNVLKVAS...EVELDRVAEH...NCPVAVRPVDDG...VVLIRSAVP..SLIDVLLIS.GAD.....  
 LDV-C K.LVRYHS.RTFIL.....GPNVLKVAS...EVELDRVAEH...NCPVAVRPVDDG...VVLIRSAVP..SLIDVLLIS.GAD.....  
 LDV-P K.IVKYHS.RTFIL.....GPNVLKVAS...EVELDRVAEH...NCPVAVRPVDDG...VVLIRSAVP..SLIDVLLIS.GAD.....  
 EAV KGFVALHS.RTMFLAA.....RDFLENIKVCV...DEDFKTKP...DILLGYVRACPGY...WFIKRTHR..SLIDAYWD.SME.....

\*\*\*\*\*  
 preA<sub>N</sub> A<sub>N</sub> B<sub>N</sub> \*\*\*\*\*

JPRED\_R  
PSIPRED\_R  
JPRED\_M  
PSIPRED\_M  
JPRED\_C  
PSIPRED\_C  
JPRED\_A  
PSIPRED\_A

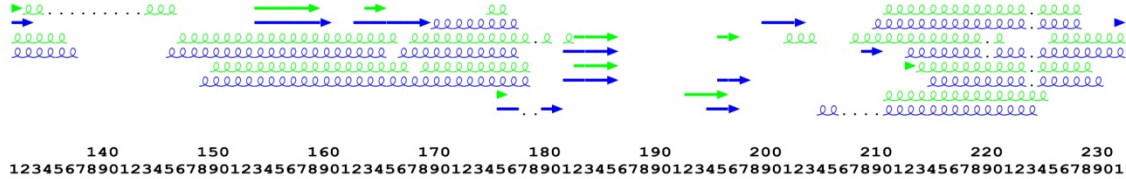

**Roniviridae**

GAV WLC.....KNICNHKSCNLIKMDIFDYTYTCTYKAHSFALQACSTYNFDITPDNICPEG.VYDFETFRIGT.RDP IKALNAVFCIER.HWFFSGLS  
YHV WLC.....KNICNHKSCNLIKMDIFDYTYTCTYKAHSFALQACSTYNFDITPDNICPEG.VYDFETFRPGN.CDP IKALNAVFCIER.HWFSAGLS

**genome coordinates (nt)**

12389-12946  
12428-12985

**Mesoniviridae**

CAV LLKIKS.HTPSPQHTCCMLCRRFLAEFGLLLHKLNKVKVETTRAILT.HYDFVLTADNVDLNG.IIDFEDYKLLK.STIAHDVKSQLR.IMQ.PYYHALYS  
CASV LLKIKS.HTPSPQHTCCMLCRRFLAEFGLLLHKLNKVKVETTRINIA.HYDFVLTADNVDLNG.IIDFEDYKLLK.STIAHDVKSQLR.IMQ.PYYHTLYS  
DKNV LLKIKS.HTPSPQHTCCMLCRRFLAEFGLLLHKLNKVKVETTRILQ.GYEFVLTADNVDLNG.IIDFEDYKLLK.STIAHDVKSQLR.IMQ.PYYHTLYS  
HanaV LLKIKS.HTPSPQHTCCMLCRRFLAEFGLLLHKLNKVKVETTRKMLT.HYDFVLTADNVDLNG.IIDFEDYKLLK.STIAHDVKSQLR.IMQ.PYYHMLYS  
MeseV LLKIKS.HTPSPQHTCCMLCRRFLAEFGLLLHKLNKVKVETTRILLR.HYDFVLTADNVDLNG.IIDFEDYKLLK.STIAHDVKSQLR.IMQ.PYYHMLYS  
NnoV LNNIQQ.HSSAPQHTCCMLCRRFLAEFGLLLHKLNKVKVETTRINIA.HYDFVLTADNVDLNG.IIDFEDYKLLK.STIAHDVKSQLR.IMQ.PYYHTLYS

7925-8518  
7815-8411  
8098-8691  
7916-8512  
7864-8457  
7777-8737

**Coronavirinae**

SARS-CoV ...YFN.KKDWDYDFVENPDIILRVYANLGERVRSLLKTVQFCDA MRDAGIVGVLTLDDNQLDNGNWFYDFGDFVQVA.PCGGVPVIVD.SYSSLLM.PILTLTRA  
RbcCoV\_HKU14 ...YFT.QKDWDYDFVENPDIINVYKLLGPIFNRRALVNTAEFADALVEAGLVGVLTLDDNQLDNGNWFYDFGDFVITA.PCGGVAIVAD.SYSSYMM.PILAMCHA  
MHV-2 ...YFQ.KKDWDYDFVENSDDIINVYKLLGPIFNRRALNLTAKFADTLVEAGLVGVLTLDDNQLDNGNWFYDFGDFVKTIV.PCGGVAIVAD.SYSSYMM.PMLTMCHA  
HCoV\_HKU1 ...YFS.KKDWDYDFVENPDIINVYKLLGPIFNRRALNLTVSFADTLVKVGLVGLVTLDDNQLDNGNWFYDFGDFITQTA.PGFGVAIVAD.SYSSYMM.PMLTMCHA  
Ea1CoV ...YFD.NKLFDFVENPDIIRVYHKLGEIVRRAMLTAKVCTDCHMVKSLVGLVTLDDNQLDNGNWFYDFGDFVITQ.PGAGVAIVD.SYSSYMM.PVLSMTDA  
Tbcov/133/2005 ...YFD.NKLFDFVENPDIIRVYHKLGERIRAOVLNTRKFCQDMVKSLVGLVTLDDNQLDNGNWFYDFGDFVITQ.PGAGVAIVD.SYSSYMM.PVLSMTNC  
BcCoV\_HKU5 ...YFD.NKLFDFVENPDIIRVYHKLGERIRAOVLNTRKFCQDMVKSLVGLVTLDDNQLDNGNWFYDFGDFVITQ.PGAGVAIVD.SYSSYMM.PVLSMTNC  
MERS-CoV ...YFE.NKLFDFVENPDIIRVYHKLGERIRAOVLNTRKFCQDMVKSLVGLVTLDDNQLDNGNWFYDFGDFVITQ.PGAGVAIVD.SYSSYMM.PVLSMTDC  
BcCoV\_HKU9 ...YFD.RKDWDYDFVENPDIIRVYHKLGEIVRRAMLTAKVCTDCHMVKSLVGLVTLDDNQLDNGNWFYDFGDFIEGP.AGAGVAIVD.SYSSYMM.PIYMTDM  
BcCoV\_CDPHE15 ...YFE.NKLFDFVENEDIRRVYAKLGVVAVRAMLKCVLDCDAMVKAIVGVLTLDDNQLDNGNWFYDFGDFVPSL.EGMGVPCLT.SYSSYMM.PIMGMTNC  
HCoV-NL63 ...YFD.SKGWDYDFVENEDIRRVYASLGKIVARAMLKCVLDCDAMVKAIVGVLTLDDNQLDNGNWFYDFGDFVPSL.PNMGVPCCT.SYSSYMM.PIMGMTNC  
BcCoV\_HKU8 ...YFD.NKNWDYDFVENEDIRRVYAKLGVVAVRAMLKCVLDCDAMVKAIVGVLTLDDNQLDNGNWFYDFGDFITGI.PGVGVPLAT.SYSSYMM.PVMGMTNC  
BcCoV\_HKU2 ...YFD.NKVWDYDFVENEDIRRVYAKLGVVAVRAMLKCVLDCDAMVKAIVGVLTLDDNQLDNGNWFYDFGDFVDM.PMGVPCCT.SYSSYMM.PIMTMTNC  
BcCoV\_1A ...YFD.NKSWDYDFVENEDIRRVYAKLGVVAVRAMLKCVLDCDAMVKAIVGVLTLDDNQLDNGNWFYDFGDFVTSI.PGVGVPCCT.SYSSYMM.PAMGMANC  
AcoV ...YFE.MKNWDYDFVENEDIRRVYAKLGVVAVRAMLKCVLDCDAMVKAIVGVLTLDDNQLDNGNWFYDFGDFVLC.PMGVPCCT.SYSSYMM.PVMGMTNC  
BcCoV/512/2005 ...YFD.NKLFDFVENEDIRRVYAKLGVVAVRAMLKCVLDCDAMVKAIVGVLTLDDNQLDNGNWFYDFGDFVTSV.KMGVPICT.SYSSYMM.PVMGMTNC  
PEDV ...YFN.NKVWDYDFVENEDIRRVYAKLGVVAVRAMLKCVLDCDAMVKAIVGVLTLDDNQLDNGNWFYDFGDFTCST.KMGVPICT.SYSSYMM.PVMGMTNC  
BcCoV\_HKU10 ...YFD.NKFWDYDFVENEDIRRVYAKLGVVAVRAMLKCVLDCDAMVKAIVGVLTLDDNQLDNGNWFYDFGDFAKTL.PMGVPLCT.SYSSYMM.PVMGMTNC  
MCoV ...FFD.NPDWDYDFVENEATHRVYAKLGVVAVRAMLKCVLDCDAMVKAIVGVLTLDDNQLDNGNWFYDFGDFVTSI.GCGCACVTSYSSYMM.PIMGMTSC  
FcoV\_UU2 ...FFE.NKDWDYDFVENEATHRVYAKLGVVAVRAMLKCVLDCDAMVKAIVGVLTLDDNQLDNGNWFYDFGDFVKT.PGLGCACVTSYSSYMM.PIMGMTSC  
IBV HPKWFENKDYDPIENPKYAYLAKMGP.IVRRALLNAVEFGNLMVKEKGVVGIITLDDNQLDNGNWFYDFGDFQKT.PGAGVPVFD.SYSSYMM.PIAMTDA  
BcCoV\_HKU22 ...YFD.QPNWDYDFVENPDIIRVYAKLGVVAVRAMLKCVLDCDAMVKAIVGVLTLDDNQLDNGNWFYDFGDFKVL.PCGGVPVIT.SYSSYMM.PCLTACDA  
SpCoV\_HKU17 ...WFG..ENWFDPIENPSYKPEPHKLGDLNRCVLANANKFAEACQAGLVGILTPDNDQLDNGNWFYDFGDFITQ.PGNGCVDLAS.SYSSYMM.PIMSMTHM  
MuCoV\_HKU13 ...WFG..ELWYDPIENPTFYREPHKLGVLNRCVLANANKFAEACQAGLVGILTPDNDQLDNGNWFYDFGDFISTQ.PGNGCCDMS.SYSSYMM.PIMSMTHM  
CMCoV\_HKU21 ...WFD..DQWFDPIENPTFYREPHKLGVLNRCVLANANKFAEACQAGLVGILTPDNDQLDNGNWFYDFGDFIVTQ.PGNGCVDLAS.SYSSYMM.PIMSMTHM  
BuCoV\_HKU11 ...WFG..DSWFDPIENPTFYREPHKLGVLNRCVLANANKFAEACQAGLVGILTPDNDQLDNGNWFYDFGDFITQ.PGNGCVDLAS.SYSSYMM.PIMSMTHM  
Tbcov\_HKU12 ...WFD..EQWYDPIENPTFYREPHKLGVLNRCVLANANKFAEACQAGLVGILTPDNDQLDNGNWFYDFGDFITQ.PGNGCVDLAS.SYSSYMM.PIMSMTHM  
WcCoV\_HKU16 ...WFG..DLWYDPIENPTFYREPHKLGVLNRCVLANANKFAEACQAGLVGILTPDNDQLDNGNWFYDFGDFILTQ.PGNGCIDLS.SYSSYMM.PIMSMTHM  
NHCoV\_HKU19 ...WVF..DGWYDPIENPTFYREPHKLGVLNRCVLANANKFAEACQAGLVGILTPDNDQLDNGNWFYDFGDFVITQ.PGNGCIDMS.SYSSYMM.PIMSMTHM  
W1CoV\_HKU20 ...FEE..GVWYDPIENPHYTFPHKLGELINKCVLMANKFVSTVTKLGLVGLTLPDNDQLDNGNWFYDFGDFYQSK.S.VGCVDMESYSSYMM.PAMSLTHM

13494-14120  
13618-14244  
13538-14164  
13603-14229  
13689-14315  
13669-14295  
13790-14416  
13538-14161  
12974-13600  
12625-13239  
12532-13146  
13028-13642  
12539-13153  
13141-13755  
12625-13239  
12743-13357  
12709-13323  
12713-13327  
12392-13006  
12440-13054  
12445-13083  
12480-13091  
11520-12167  
11688-12335  
11157-11804  
11448-12095  
11499-12146  
11445-12092  
11407-12057  
11018-11617

**Torovirinae**

PToV\_SH1 .....EFFEDAKQRSH...LAFLLPEAIIASFCDIFS YIKKFGLPYKLTLDNMDLKGNYLDFGDFYPCP...NVVDNQ.SALFVLA.EVWSMTRK  
BRV-1 .....EFLDDANQRSY...LANLLEPAIIASFCEIFHCVRKGCQVPYKLTLDNMDLKGNYLDFGDFYPCP...NKVDNQ.SALFVLA.EVWSMTRK  
WBV .....TCLDPGNYSY.NFKEQLRNKLASVIPNVNKILAAELPLAITLDNMDLKGNYLDFGDFYPTN...GKVTNYHVVS.CMR.QIATFCSL  
FHMNV .....RVLDPPGFYSYH.FPKSEIRKVLTKCIPNVNLIKANLPMALITLDNMDLKGNYLDFGDFYQK...EIPSNRHVIEAIR.QLAVFCAL  
BENV .....GKPEASEQLAN...ELAQQLEPAFNDLKRDLRWCYKYDVPQLITLDNMDLKGNYLDFGDMGTS...SH.NDIALSDLM.RLWSLTRN

14139-14663  
14292-14816  
14666-15193  
15435-15962  
18564-19085

**Arteriviridae**

SHFV .....GSCYVTPVTPVILKLNPGDITGCGHEWDFBELTVPR...SRVFAQDIATLRNEAGLMTIG  
SHFV-LVR .....AT...CREPLHSPGDOQIDGYLWDFEAPHSKE...AIWLSNQIISACAARRGAPGC  
SHFV-krtg2 .....AQ...YVQAQHGPGDQIDGYLWDFEAPHSKD...LVKFSAEIIAACARRGAPRY  
SHFV-krtg1 .....AE...HIVAQHGPGDQIDGYLWDFEAPHSKD...LVKFSAEIIAACARRGAPRY  
PRRSV-2 .....AE...WQPALHGPNGTIDGYLWDFEAPASKE...ELFLTKQIVDACALRRGAPAC  
PRRSV-1 .....ASP...KLLACHGPGNTIDGYLWDFESEATKE...EVLISAQIIQACDMRRGAPAI  
LDV-C .....IAP...GIQPGHGAGNMGVDSYVDFETAPTKA...ELELSKQIIQACEVRRGAPNL  
LDV-P .....AD...LISPTHGPGNTGVHGFTWDFEAPPTDL...EELSEQIIITACIRRGAPSL  
EAV .....AB...FFPRTHGPGNTGHRFVWDFESPVDL...EELSEQIIITACSMRRGAPAL  
.....CVYALP.TISDFVSPGDVAVTGERWDFESPGGGR...AKRLTADLVHAFQGFHGASYSY

2889-3233  
6587-6937  
6412-6759  
6405-6752  
6412-6762  
7350-7694  
7388-7732  
6902-7243  
6837-7178  
5468-5839

**motifs**

\*\*\*\*\*

C<sub>N</sub>

**Supplementary Figure 1:** The nidovirus-wide NiRAN MSA encompassing conserved motifs. Virus names and accession numbers are listed in Table S1. Fully and partially conserved residues are depicted in white font with red background and red font, respectively. Sequence motifs are indicated by stars. Secondary structure predictions are shown on the top of the MSA. The name of each prediction indicates software used (Jpred 3 or PSIPRED) and which family-specific NiRAN MSA (R, *Roniviridae*; M, *Mesoniviridae*; C, *Coronaviridae*; A, *Arteriviridae*) were used to produce it. The plot was generated with ESPript.

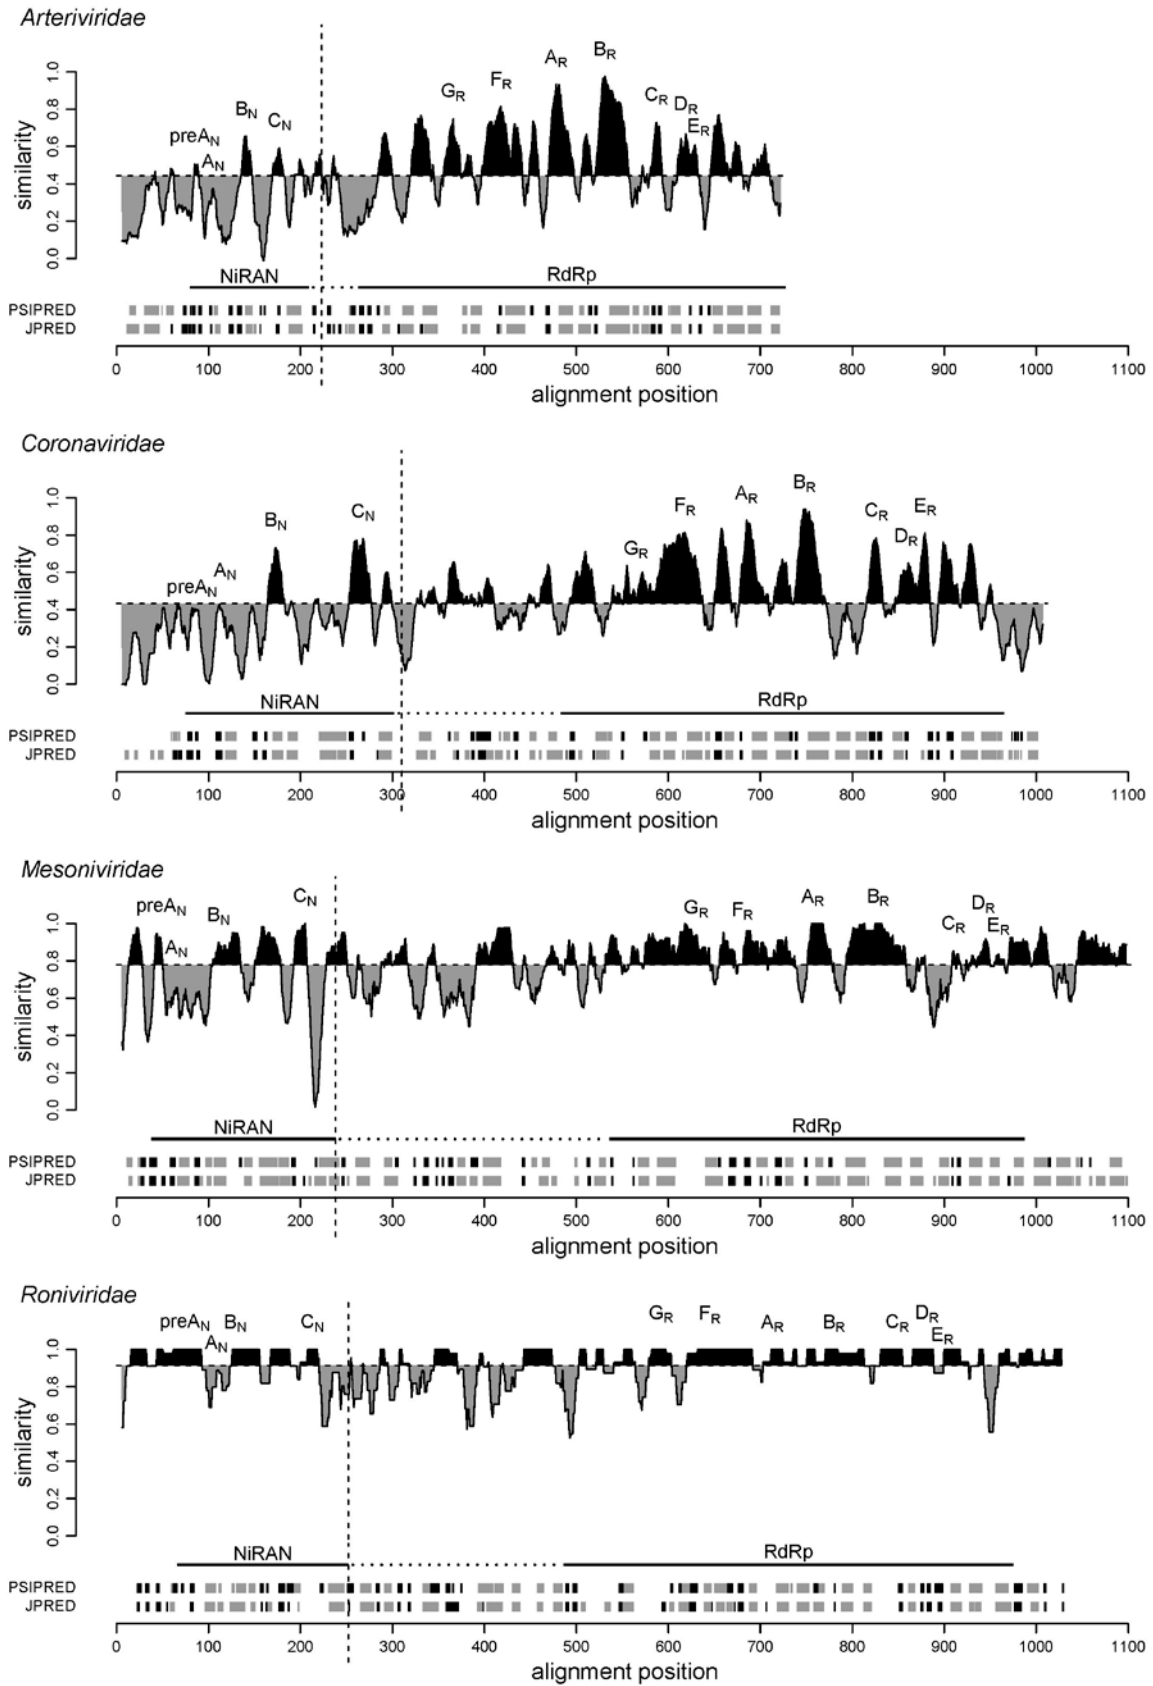

**Supplementary Figure 2:** Sequence variation, domain organization, and secondary structure of NiRAN-RdRp-containing proteins of nidovirus families. For each family, the similarity density plot obtained for the MSA of proteins including the NiRAN and RdRp domains is shown. To highlight the



regional deviation of conservation from that of the MSA average, areas above and below the mean similarity are shaded in black and gray, respectively. Sequence motifs of NiRAN and RdRp are labelled. Uncertainty in respect to the domain boundary between NiRAN and RdRp is indicated by dashed horizontal lines. Domain boundaries used for all bioinformatics analyses are indicated by dashed vertical lines. Below each similarity density plot predicted secondary structure elements are presented in gray for  $\alpha$ -helices and black for  $\beta$ -strands.

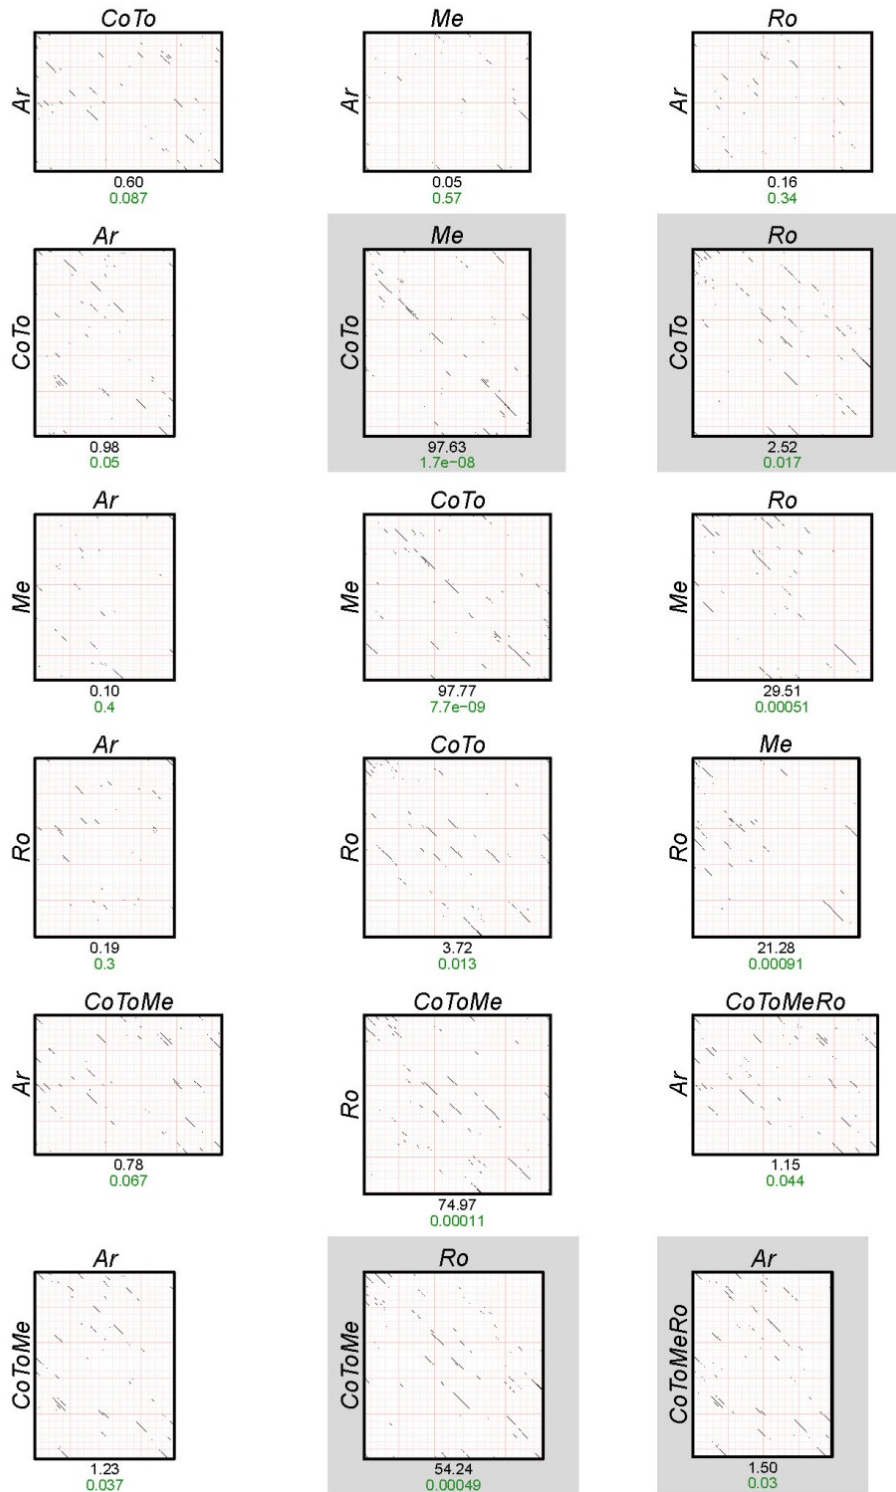

**Supplementary Figure 3:** Pairwise MSA-based HMM-HMM comparison of NiRANs of different origins. Each MSA of NiRAN was converted into an HMM profile, all possible pairs of different HMMs were aligned using HH-align. The label at the left and top of each plot specifies the group of viruses used as query and target in HMM-HMM comparison, respectively. Below each dot-plot the confidence (%) of the target being homologous to the query and the E value of the top local hit are shown in black and green, respectively. The four plots highlighted with grey background are also presented in Fig. 3.

**A**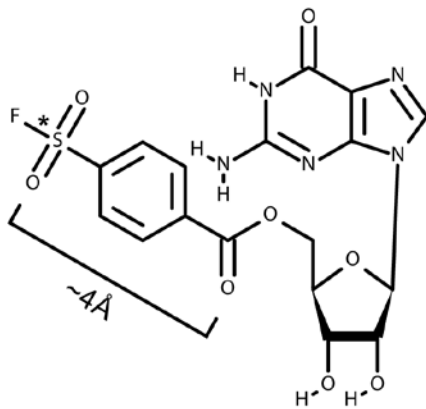**B**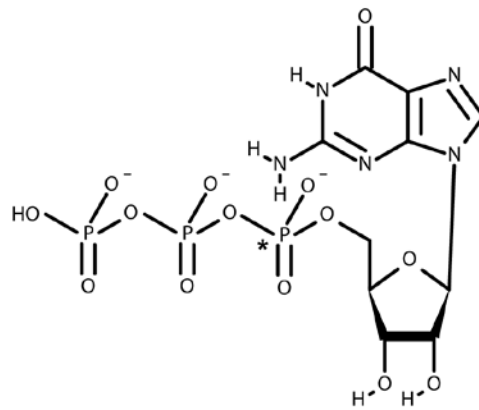**C**

```

GLDQDKVLDL  TNMLKVDPTE  LSSKDKAKAR  QLAHLLLDLA  NPVEAVNQLN  5 0
LRAPHIFPGD  VGRR(TFADSK(D)GFVALHSR)  TMFLAARDFL  FNIFKFCDEE  1 0 0
FTKTPK(TLL  GYV)ACPGYW  FIFRRTHRSL  IDAYWDSMEC  VYALPTISDF  1 5 0
DVSPGDVAVT  GERWDFESPG  GGRAKRLTAD  LVHAFQGFHG  ASYSY  DDK(VA)  2 0 0
AAVSGDP(Y)R(S  DGVLYNTR)WG  NIPYSVPTNA  LEATACYRAG  CEAVTDGTNV  2 5 0
IATIGPFPEQ  QPIPDIPKSV  LDNCADISCD  AFIAPAAETA  LCGDLEKYNL  3 0 0
STQGFLVPSV  FSMVRAYLKE  EIGDAPPLYL  PSTVPSKNSQ  AGINGAEFPT  3 5 0
KSLQSYCLID  DMVSQSMKSN  LQTATMATCK  RQYCSKYKIR  SILGTNNYIG  4 0 0
LGLRACLSGV  TAAFQKAGK(D  GSPYYLGKSK)  FDPPIPAPDKY  CLETDLESCD  4 5 0
RSTPALVRWF  ATNLIFELAG  QPELVHSYVL  NCCHDLVVAG  SVAFTKRGG  5 0 0
SSGDPITSIS  NTIYSLVLYT  QHMLLCGLEG  YFPEIAEKYL  DGSLELRDMF  5 5 0
KYVRVYIYSD  DVVLTTPNQH  YAASFDRWVP  HLQALLGFKV  DPKKTVNTSS  6 0 0
PSFLGCRFKQ  VD GKCYLASL  QDRVTR(SLLY  HIGAK)NPSEY  YEA AVSIFKD  6 5 0
SIICCEDDW  TDLHRRISGA  ARTDGVFPT  IEMLTSFRTK  QYE

```

**Supplementary Figure 4:** (A) FSBG and (B) GTP structures indicating the spatial separation of the points of attack in FSBG and GTP. Asterisks mark the positions of the nucleophilic attack. (C) Mass spectrometry analysis of FSBG-linked EAV nsp9 identified seven unique, modified peptides (outlined) located either in vicinity of the NiRAN (dark gray background) or within the C-terminal RdRp domain (light gray background). Residues carrying the sulfonylbenzoyl modification are colored in red. Sequence or structural motifs are indicated by dashed lines above the sequence in the order preA<sub>N</sub>, A<sub>N</sub>, B<sub>N</sub>, C<sub>N</sub>, A<sub>R</sub>, and E<sub>R</sub>. See also Fig. 2A.

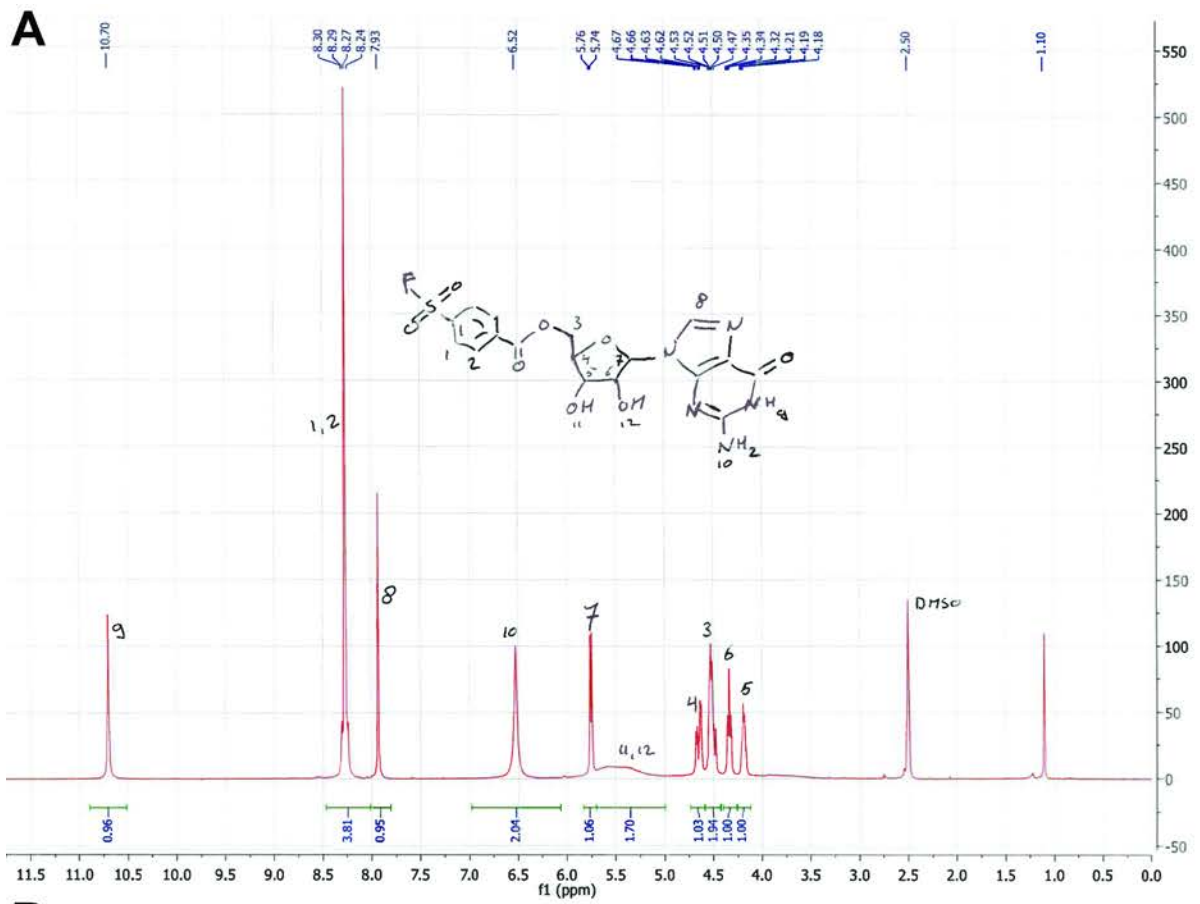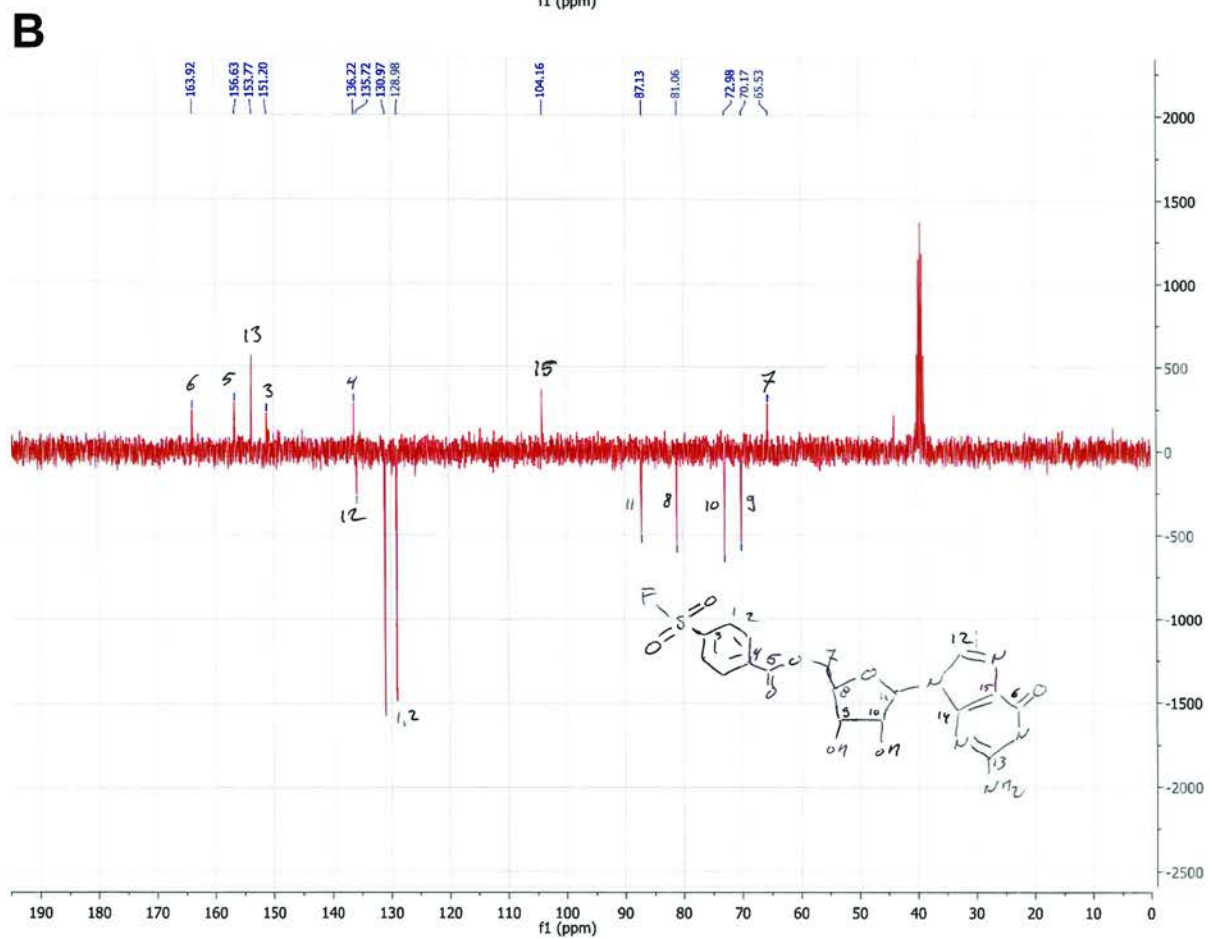

**Supplementary Figure 5:** NMR analysis of 5'-(4-fluorosulfonylbenzoyl)guanosine. **(A)**  $^1\text{H}$  NMR (300 MHz,  $\text{DMSO-d}_6$ )  $\delta$  10.70 (s, 1H), 8.38 – 8.12 (m, 4H), 7.93 (s, 1H), 6.52 (broad s, 2H), 5.75 (d,  $J = 4.8$  Hz, 1H), 5.75 (broad s, 2H), 4.65 (dd,  $J = 11.9, 3.6$  Hz, 1H), 4.59 – 4.42 (m, 2H), 4.34 (t,  $J = 5.1$  Hz, 1H), 4.25 – 4.12 (m, 1H). **(B)**  $^{13}\text{C}$  NMR (75 MHz,  $\text{DMSO-d}_6$ )  $\delta$  163.92, 156.63, 153.77, 151.20, 136.22, 135.72, 130.97, 128.98, 104.16, 87.13, 81.06, 72.98, 70.17, 65.53. Corresponding peaks and atoms are indicated by numbers.
